# Supplementary material
Source: PubMed Central journal article supplement (PMC1425846)
Supplement: plntcell_tpc.106.040998_1.pdf [file plntcell_tpc.106.040998_1.pdf]

**Supplemental Table 1:** Protein levels and Phenotypes of tobacco lines carrying *35S:NtCMPG1* constructs.

| Construct   | T1 independent lines protein levels | T1 independent lines HR | Transgene Insertion number | T2 segregating population HR |
|-------------|-------------------------------------|-------------------------|----------------------------|------------------------------|
| NtCMPG1W64A | A, E, F, K, M (-)                   | As control              | NT <sup>a</sup>            | NT                           |
|             | G, H (+)                            | As control              | >1, 1                      | NT                           |
|             | I, J (++)                           | As control              | 1                          | As control                   |
|             | B, D (+++)                          | As control              | >1                         | Correlation <sup>b</sup>     |
| NtCMPG1C37A | A, B, D, F, J (-)                   | As control              | NT                         | NT                           |
|             | C (+)                               | As control              | 1                          | NT                           |
|             | G (++)                              | < control               | 1                          | NT                           |
|             | I (++)                              | < control               | 1                          | Correlation                  |

<sup>a</sup> NT: non tested

<sup>b</sup> "Correlation" means that high level of protein correlates with low HR
