# Supplementary material
Source: PubMed Central journal article supplement (PMC1425846)

Supplemental Figure 1

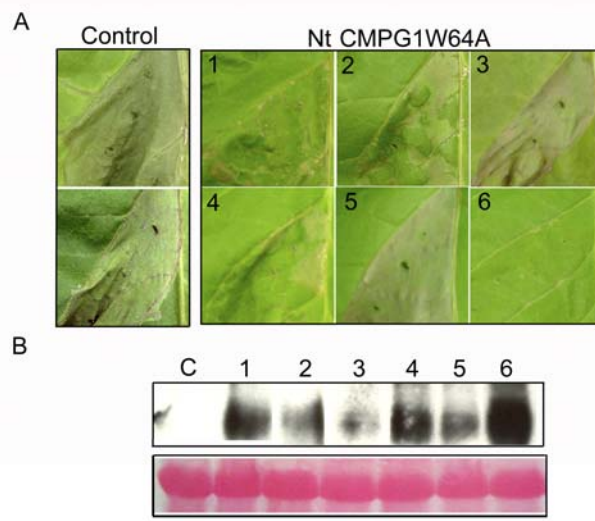

Supplement: plntcell_tpc.106.040998_2.pdf [file plntcell_tpc.106.040998_2.pdf]

## Supplemental Figure 2

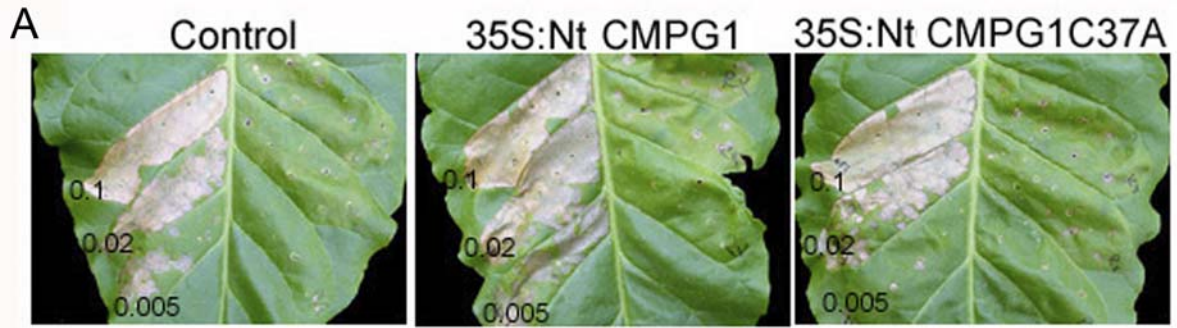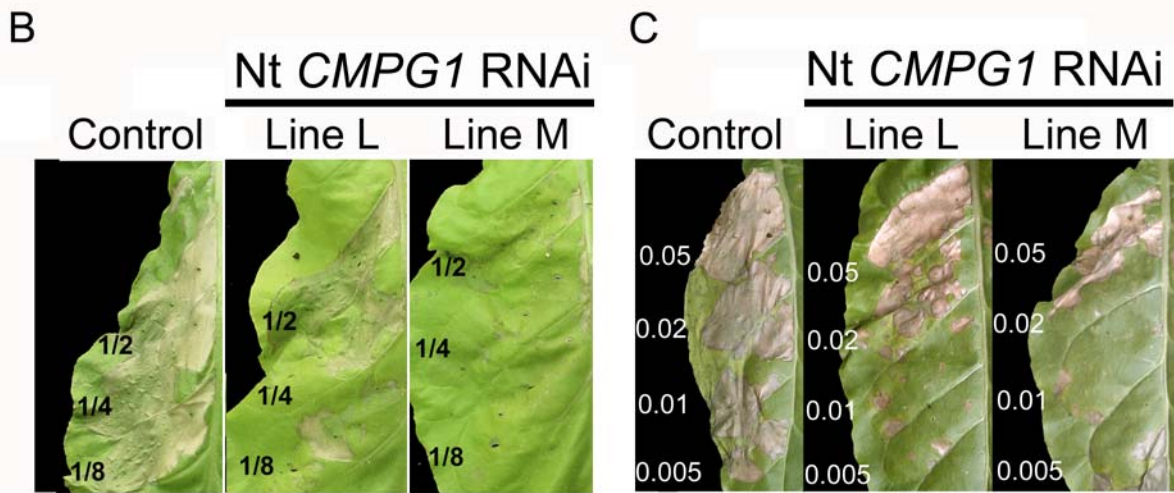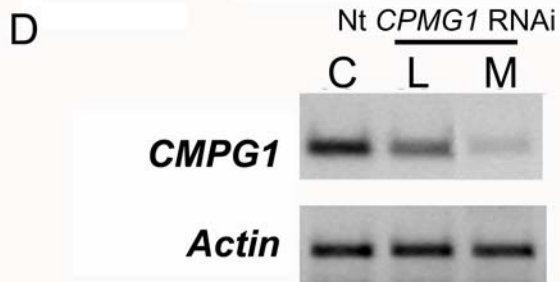

Supplement: plntcell_tpc.106.040998_3.pdf [file plntcell_tpc.106.040998_3.pdf]

### Supplemental Figure 3

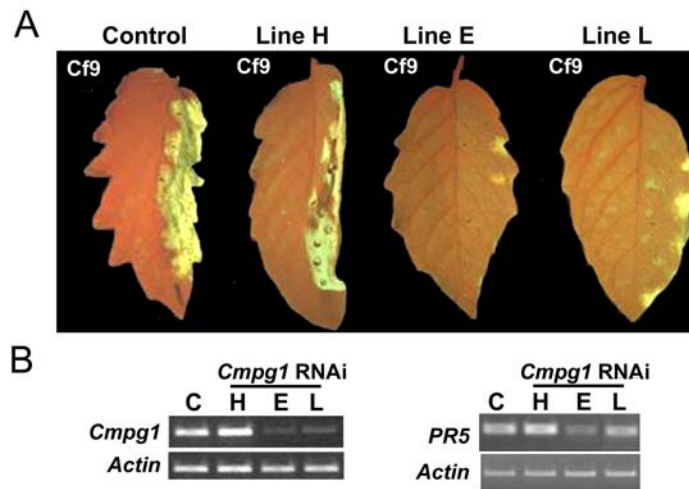

Supplement: plntcell_tpc.106.040998_4.pdf [file plntcell_tpc.106.040998_4.pdf]
